# Supplementary material for: A general top-down approach to synthesize rare earth doped-Gd2O3 nanocrystals as dualmodal contrast agents
Source: Royal Society of Chemistry journal article supplement (doi:10.1039/c4tb00695j), 2014-01-01
Supplement: c4tb00695j1.pdf [file c4tb00695j1.pdf]

Supporting Information

**A general top-down approach to synthesize rare earth doped-Gd<sub>2</sub>O<sub>3</sub> nanocrystals  
as dualmodal contrast agents**

Ningqi Luo, Chuan Yang, Xiumei Tian, Jun Xiao, Jun Liu, Fei Chen, Donghui Zhang, Dekang Xu,  
Yueli Zhang, Guowei Yang, Dihu Chen, and Li Li

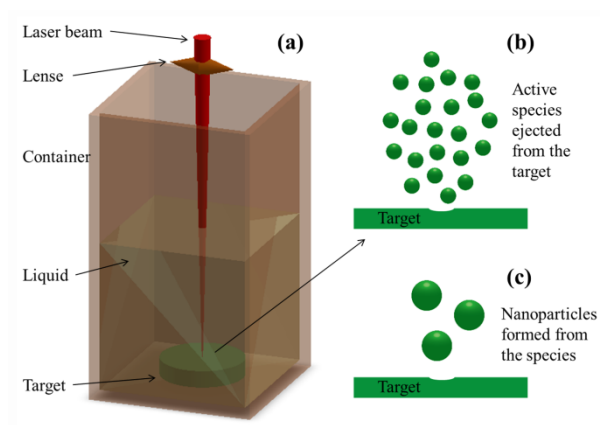

Figure S1 (a) Experimental setup of Laser Ablation in Liquid (LAL). (b) Active species ejected from the target after energy absorption of the focused laser. (c) Nanoparticles formed from the active species aggregation.

## Supporting Information

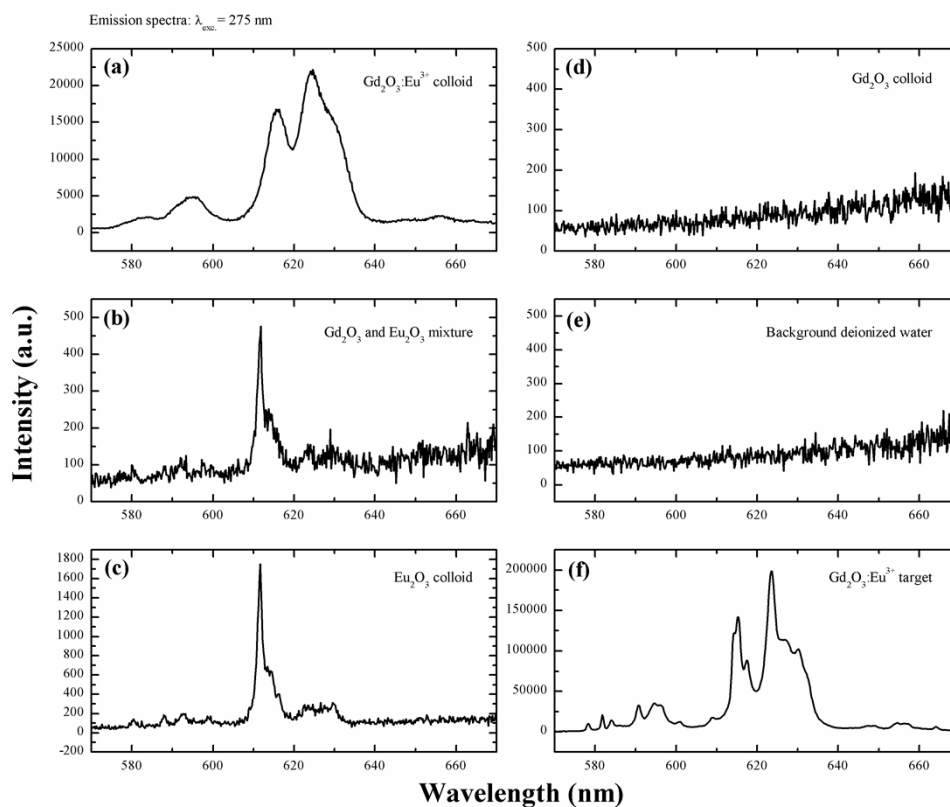

Figure S2. Emission spectra of  $Gd_2O_3:Eu^{3+}$  colloid,  $Gd_2O_3$  and  $Eu_2O_3$  mixture,  $Eu_2O_3$  colloid,  $Gd_2O_3$  colloid, background deionized water, and  $Gd_2O_3:Eu^{3+}$  target respectively.

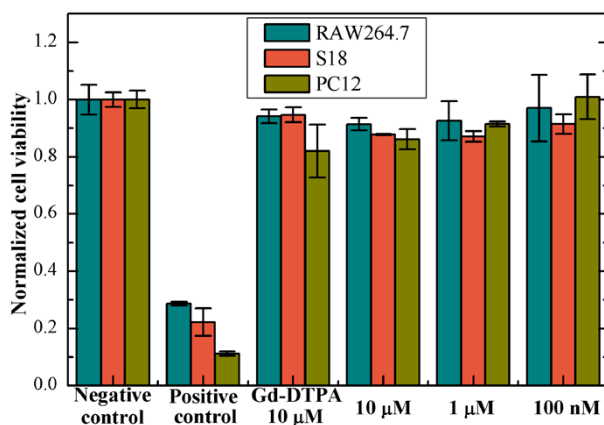

Figure S3 Cell viability of RAW264.7, S18, and PC12 cells after co-incubation with different concentrations of  $Gd_2O_3:Eu^{3+}$  nanoparticles (10  $\mu$ M, 1  $\mu$ M and 100 nM Gd ion concentrations) for 48h, compared with Gd-DTPA (10  $\mu$ M), negative control (DMEM), and positive control (5% DMSO).

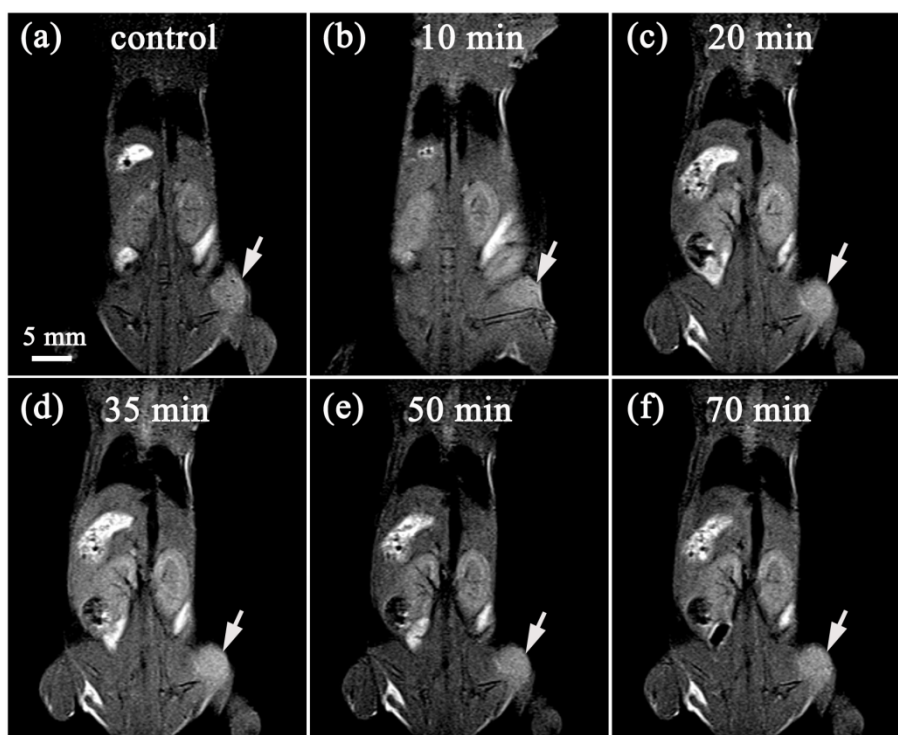

Figure S4. In vivo MRI of a NPC CNE-2 xenografted tumor. Before (a), 10min (b), 20min (c), 35min (d), 50min (e), and 70min(f) after injection of the  $\text{Gd}_2\text{O}_3:\text{Eu}^{3+}$  nanoparticles ( $15 \mu\text{mol kg}^{-1}$ ). The tumor get the best imaging enhancement after 35min of the particle injection.
